# Supplementary material for: Solvent effects on the structures and magnetic properties of two doubly interpenetrated metal–organic frameworks
Source: Royal Society of Chemistry journal article supplement (doi:10.1039/c4dt04006f), 2015-01-01
Supplement: c4dt04006f1.pdf [file c4dt04006f1.pdf]

## Solvent Effect on the Structures and Magnetic Properties of Two Doubly Interpenetrated Metal-Organic Frameworks

Fu-Ping Huang, \* Cheng Yang, Hai-Ye Li, Peng-Fei Yao, Xiao-Huan Qin, Shi-Ping Yan,  
Mohamedally Kurmoo\*

### Supporting Information

Table S1. Selected bond lengths (Å) and angles (°) for **1-H<sub>2</sub>O**

|              |           |              |           |              |           |
|--------------|-----------|--------------|-----------|--------------|-----------|
| Co1—O5       | 1.995 (9) | Co1—N1       | 2.120 (8) | Co1—N5B      | 2.180 (8) |
| Co1—O7A      | 2.052 (8) | Co1—O1       | 2.177 (8) | Co1—O2       | 2.191 (8) |
| Co2—O6       | 1.989 (8) | Co2—N6       | 2.135 (9) | Co2—O3D      | 2.176 (9) |
| Co2—O8A      | 2.038 (8) | Co2—N10C     | 2.163 (9) | Co2—O4D      | 2.244 (9) |
| O5—Co1—O7A   | 122.6 (4) | N1—Co1—O1    | 85.5 (4)  | O5—Co1—O2    | 88.7 (4)  |
| O5—Co1—N1    | 89.8 (4)  | O5—Co1—N5B   | 95.1 (4)  | O7A—Co1—O2   | 148.5 (4) |
| O7A—Co1—N1   | 89.3 (4)  | O7A—Co1—N5B  | 88.3 (4)  | N1—Co1—O2    | 94.5 (4)  |
| O5—Co1—O1    | 147.0 (4) | N1—Co1—N5B   | 175.1 (5) | O1—Co1—O2    | 59.2 (3)  |
| O7A—Co1—O1   | 90.1 (4)  | O1—Co1—N5B   | 90.3 (4)  | N5B—Co1—O2   | 85.4 (4)  |
| O6—Co2—O8A   | 123.5 (4) | N6—Co2—N10C  | 175.9 (4) | O6—Co2—O4D   | 88.2 (4)  |
| O6—Co2—N6    | 92.8 (3)  | O6—Co2—O3D   | 146.7 (4) | O8A—Co2—O4D  | 148.0 (4) |
| O8A—Co2—N6   | 87.6 (3)  | O8A—Co2—O3D  | 89.6 (4)  | N6—Co2—O4D   | 86.9 (4)  |
| O6—Co2—N10C  | 91.3 (4)  | N6—Co2—O3D   | 91.8 (4)  | N10C—Co2—O4D | 92.5 (4)  |
| O8A—Co2—N10C | 90.8 (4)  | N10C—Co2—O3D | 84.4 (4)  | O3D—Co2—O4D  | 59.1 (3)  |

Symmetry codes: A:  $x, y-1, z$ ; B:  $x+1/2, -y+3/2, z$ ; C:  $x-1/2, -y+3/2, z$ ; D:  $x, y, z+1$ .

Table S2. Selected bond lengths (Å) and angles (°) for **2-MeOH**

|             |             |             |             |              |             |
|-------------|-------------|-------------|-------------|--------------|-------------|
| Co1—O1      | 1.989 (3)   | Co1—O7B     | 2.122 (3)   | Co1—N5C      | 2.150 (3)   |
| Co1—O3A     | 2.033 (3)   | Co1—N1      | 2.126 (3)   | Co1—O8B      | 2.277 (3)   |
| Co2—O5      | 1.949 (3)   | Co2—O2      | 1.998 (3)   | Co2—N10D     | 2.233 (3)   |
| Co2—O4A     | 1.964 (3)   | Co2—N6      | 2.184 (3)   |              |             |
| O1—Co1—O3A  | 117.74 (12) | O7B—Co1—N1  | 94.29 (13)  | O1—Co1—O8B   | 91.09 (12)  |
| O1—Co1—O7B  | 149.47 (12) | O1—Co1—N5C  | 91.23 (13)  | O3A—Co1—O8B  | 151.17 (11) |
| O3A—Co1—O7B | 92.31 (11)  | O3A—Co1—N5C | 88.01 (12)  | O7B—Co1—O8B  | 59.04 (10)  |
| O1—Co1—N1   | 90.73 (13)  | O7B—Co1—N5C | 84.11 (12)  | N1—Co1—O8B   | 88.37 (12)  |
| O3A—Co1—N1  | 90.92 (12)  | N1—Co1—N5C  | 178.04 (13) | N5C—Co1—O8B  | 91.78 (12)  |
| O5—Co2—O4A  | 118.57 (13) | O4A—Co2—N6  | 91.28 (12)  | O4A—Co2—N10D | 89.60 (12)  |
| O5—Co2—O2   | 113.79 (14) | O2—Co2—N6   | 92.05 (12)  | O2—Co2—N10D  | 85.32 (12)  |
| O4A—Co2—O2  | 127.51 (12) | O5—Co2—N10D | 91.78 (13)  | N6—Co2—N10D  | 177.22 (13) |
| O5—Co2—N6   | 90.12 (13)  |             |             |              |             |

Symmetry codes: A:  $x, y-1, z$ ; B:  $x+1/2, -y+3/2, z-1/2$ ; C:  $x-1/2, -y+3/2, z-1/2$ ; D:  $x+1/2, -y+3/2, z+1/2$ .

Table S3. Crystal data and structure refinement for **1-H<sub>2</sub>O** and **2-MeOH**

| Complex                                                      | <b>1-H<sub>2</sub>O</b>                                                         | <b>2-MeOH</b>                                                                   |
|--------------------------------------------------------------|---------------------------------------------------------------------------------|---------------------------------------------------------------------------------|
| Empirical formula                                            | C <sub>40</sub> H <sub>28</sub> Co <sub>2</sub> N <sub>10</sub> O <sub>10</sub> | C <sub>41</sub> H <sub>32</sub> Co <sub>2</sub> N <sub>10</sub> O <sub>10</sub> |
| Formula weight                                               | 926.58                                                                          | 942.63                                                                          |
| Crystal system                                               | orthorhombic                                                                    | Monoclinic                                                                      |
| Space group                                                  | <i>Pna2<sub>1</sub></i>                                                         | <i>P2<sub>1</sub>/n</i>                                                         |
| <i>a</i> (Å)                                                 | 29.144(6)                                                                       | 17.497(4)                                                                       |
| <i>b</i> (Å)                                                 | 10.411(2)                                                                       | 10.171(2)                                                                       |
| <i>c</i> (Å)                                                 | 14.792(3)                                                                       | 23.344(5)                                                                       |
| $\beta$ (°)                                                  |                                                                                 | 90.54(3)                                                                        |
| Volume (Å <sup>3</sup> )                                     | 4488.2(16)                                                                      | 4154.2(14)                                                                      |
| <i>Z</i>                                                     | 4                                                                               | 4                                                                               |
| <i>D</i> <sub>calc</sub> (g/cm <sup>3</sup> )                | 1.371                                                                           | 1.507                                                                           |
| $\theta$ range for data collection                           | 1.5 to 25.00                                                                    | 1.5 to 25.25                                                                    |
| Reflections collected                                        | 20019                                                                           | 23652                                                                           |
| Independent reflections                                      | 7052 (Rint =0.141)                                                              | 7490 (Rint =0.053)                                                              |
| Data/restraints/ parameters                                  | 7052/290/569                                                                    | 7490/20/568                                                                     |
| Goodness of fit ( GOF )                                      | 1.007                                                                           | 1.022                                                                           |
| Final <i>R</i> indices[ <i>I</i> > 2 $\sigma$ ( <i>I</i> ) ] | 0.1057                                                                          | 0.0587                                                                          |
| <i>R</i> indices ( all data )                                | 0.2230                                                                          | 0.1199                                                                          |
| Largest diff. peak and hole<br>(e/Å <sup>3</sup> )           | 0.464/-0.469                                                                    | 0.621/-0.342                                                                    |

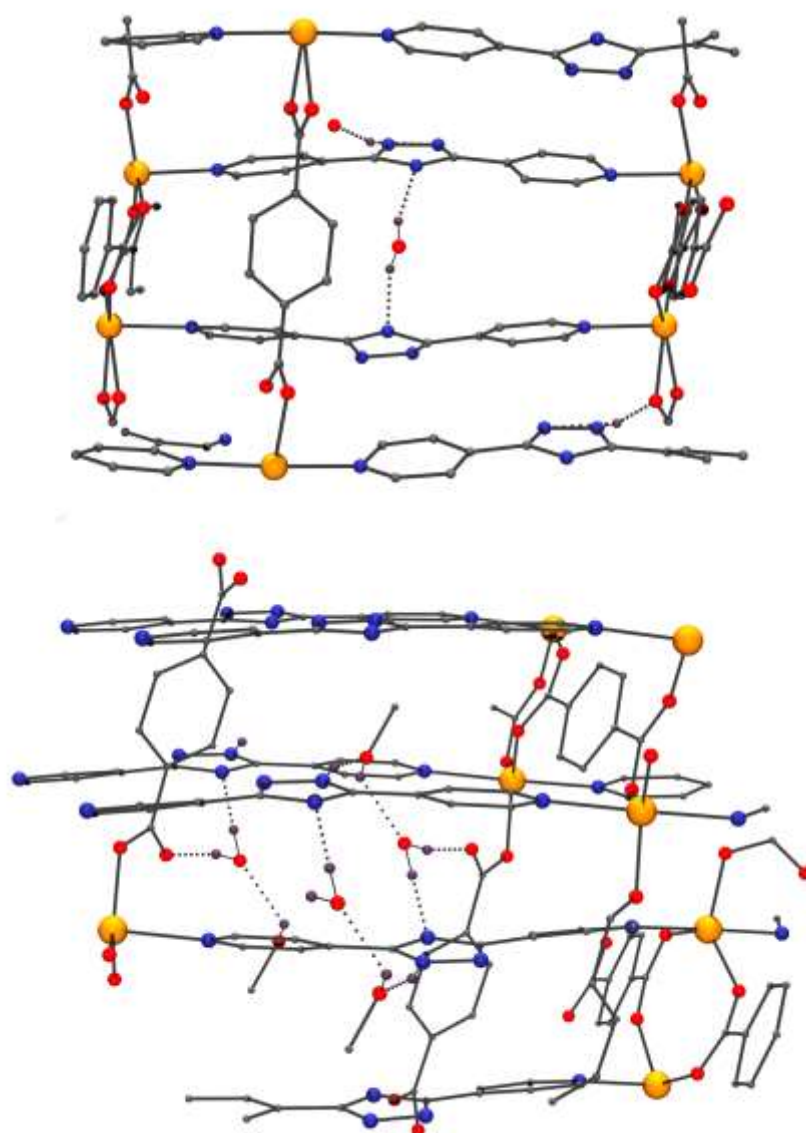

**Fig. S1.** H-bonds promoted by the solvent molecules in **1-H<sub>2</sub>O** (top) and **2-MeOH** (bottom). In **1-H<sub>2</sub>O** the water molecules interact by means of two H-bonds with the triazole rings whereas in **2-MeOH** interact with one triazole ring and the non-coordinated O-atom of the carboxylato function. Linkage with the second triazole ring is mediated by the H-bonds established by the water-methanol and methanol-triazole bonds. The triazole rings are pillared in **1-H<sub>2</sub>O** whereas they are displaced in **2-MeOH**.

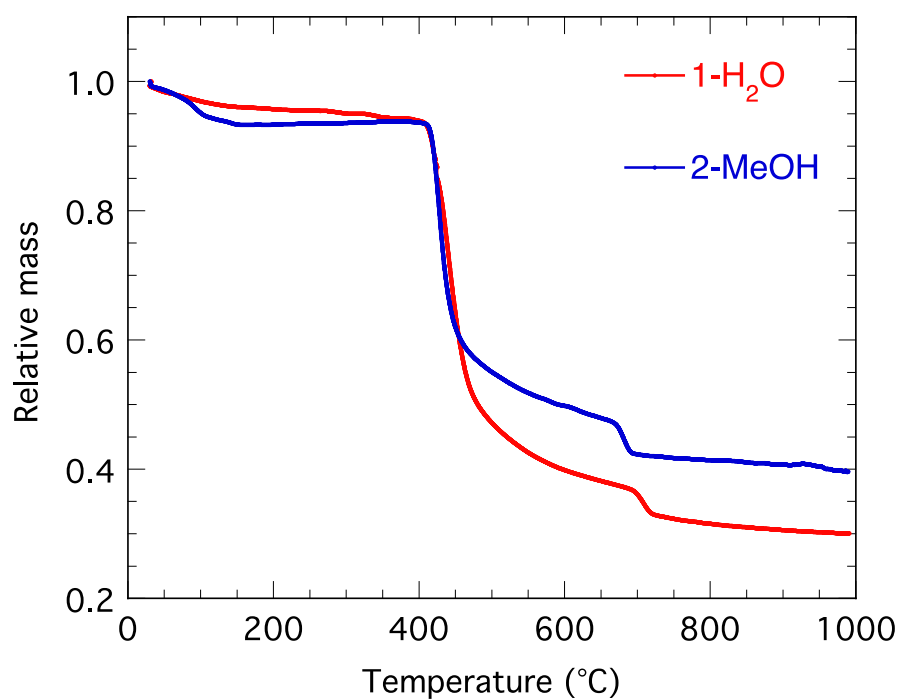

**Fig. S2.** TGA of **1-H<sub>2</sub>O** (red) and **2-MeOH** (blue).

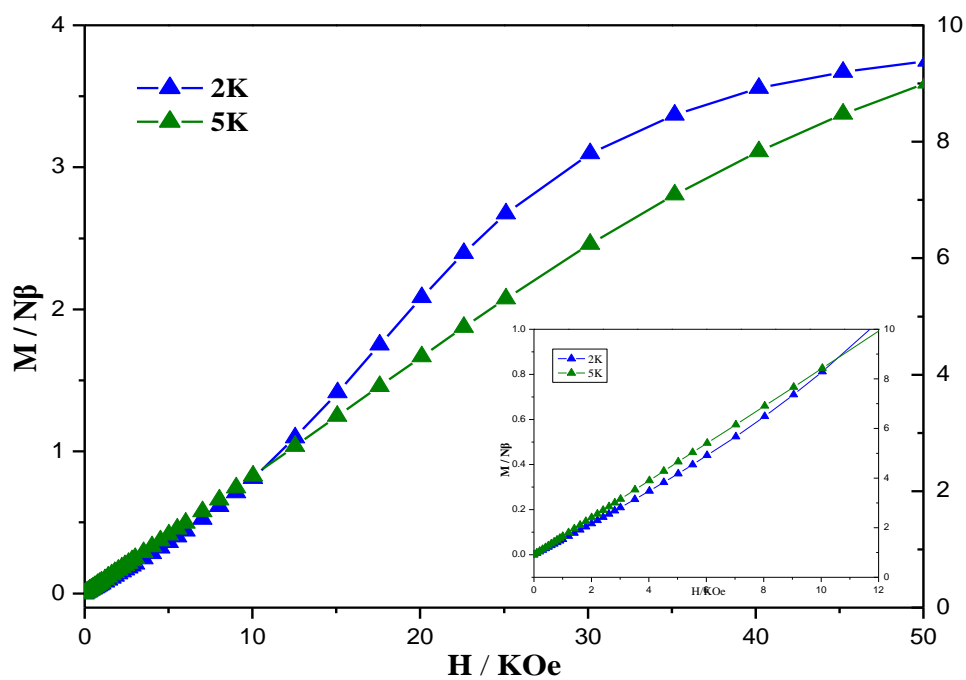

**Fig. S3.**  $M$  vs  $H$  plot for **1-H<sub>2</sub>O**. The inset is the blowup of the curves for **1-H<sub>2</sub>O** in the lower field region.
